# Supplementary material
Source: publisher figshare collection journal article supplement (https://gsajournals.figshare.com/articles/dataset/_/8171276)
Supplement: Supplementary file 1 [file 1]

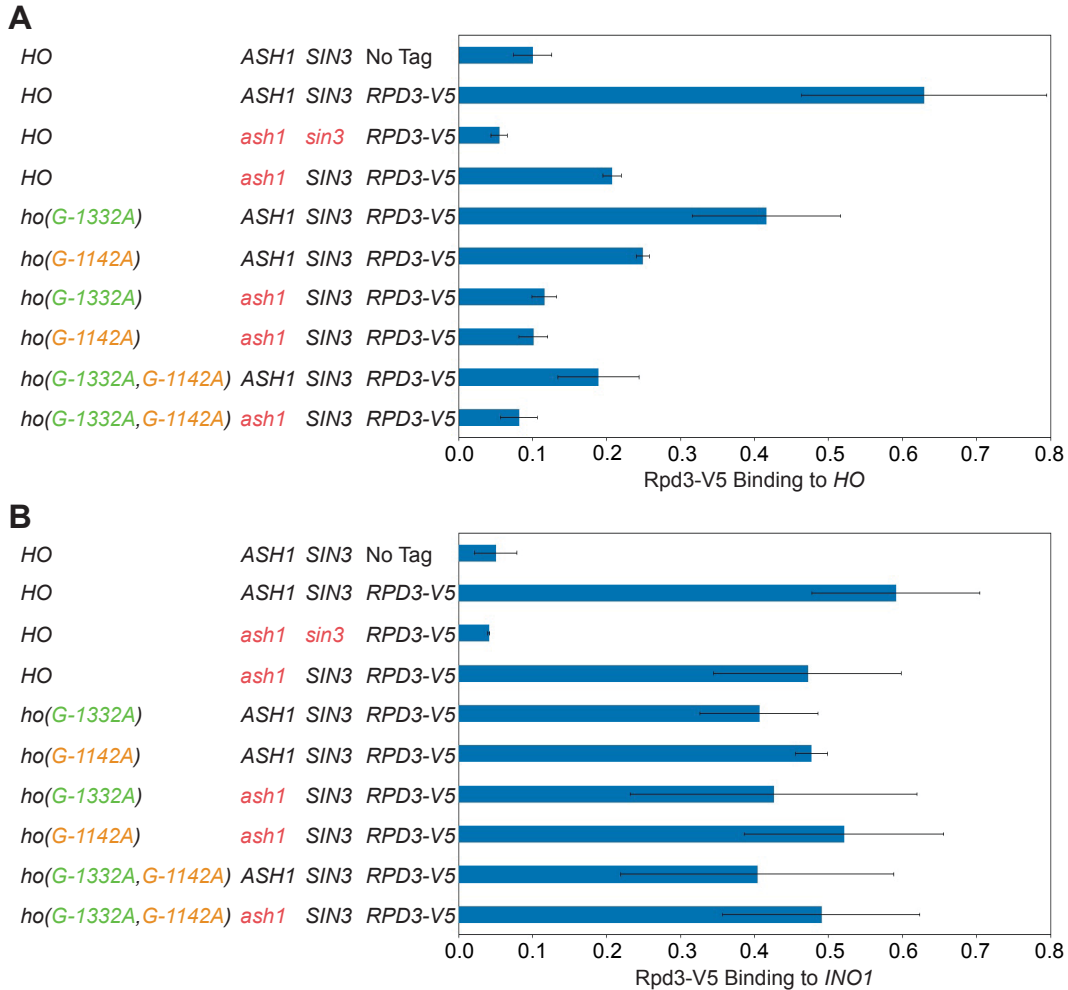

**Supplemental Figure S5. Rpd3 binding to the *HO* and *INO1* promoters by ChIP analysis.**

Binding of Rpd3-V5 in single and combination mutant strains was determined by ChIP. This is the same data presented in Figure 10, with each primer set used in Figure 10 now normalized to a negative reference control, the intergenic region *IGR-I*. Each was also normalized to the corresponding input sample and then graphed relative to the “No Tag” control. Error bars show the standard deviation of 3 biological replicates.

(A) Primers that amplify *HO* sequence from -1471 to -1250 were used.

(B) Primers that amplify *INO1* promoter sequence were used.
