# Supplementary material
Source: publisher figshare collection journal article supplement (https://gsajournals.figshare.com/articles/dataset/_/8171276)
Supplement: Supplementary file 2 [file 1]

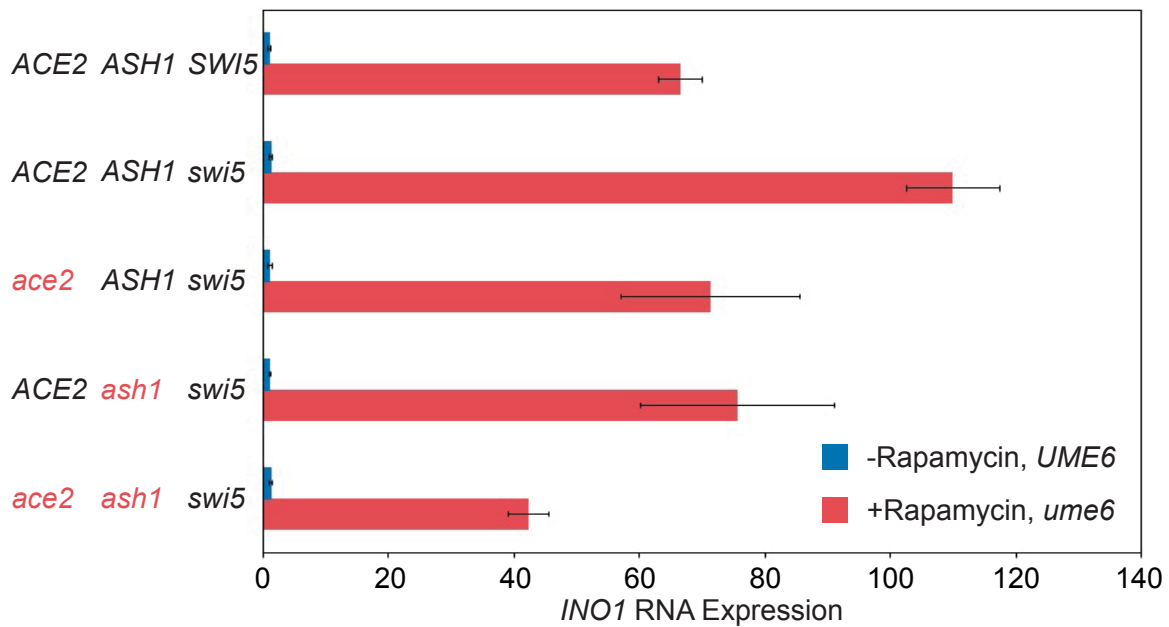

**Supplemental Figure S3. *INO1* expression increases dramatically upon Anchor Away of Ume6.**

This data is a corollary to Figure 6C, which shows *HO* RNA expression in Ume6 Anchor Away conditions. *INO1* mRNA levels were measured, normalized to *RPR1*, and expressed relative to wild type. Error bars represent the standard deviation of at least 3 biological replicates for each strain. See Materials and Methods section for a full description of genotypes and growth conditions. Cultures were split into two, and one half was untreated (-Rapamycin, *UME6*; blue bars), while the other half was treated with 1 $\mu$ g/ml rapamycin for 2 hours (+Rapamycin, *ume6*; red bars).
