# Supplementary material
Source: publisher figshare collection journal article supplement (https://gsajournals.figshare.com/articles/dataset/_/8171276)
Supplement: Supplementary file 3 [file 1]

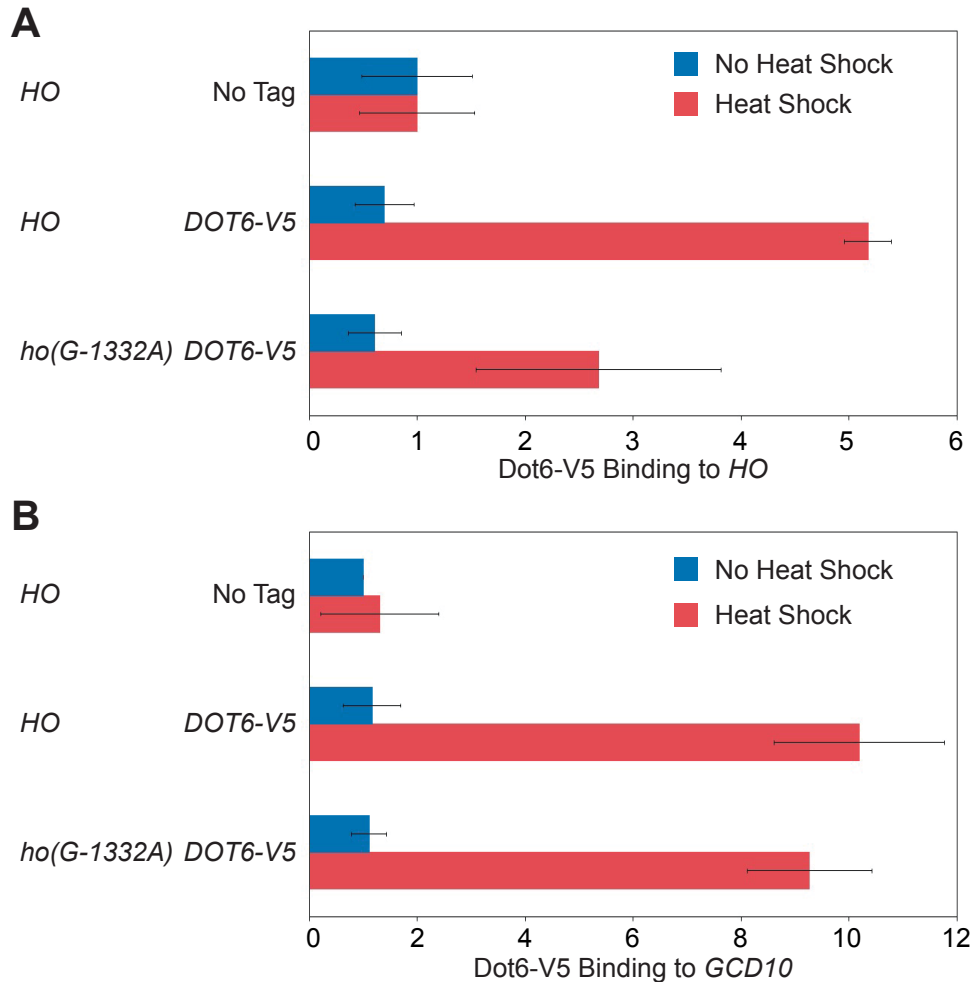

**Supplemental Figure S1. Dot6 binding to the *HO* and *GCD10* promoters by ChIP analysis.**

Binding of Dot6-V5 to *HO* wild type and *ho(G-1332A)* promoters in heat shocked cells was determined by ChIP. This is the same data presented in Figure 5B, with each primer set used in Figure 5B now normalized to a negative reference control, the intergenic region *IGR-I*. Each was also normalized to the corresponding input sample and then graphed relative to the “No Tag” control. Error bars show the standard deviation of 3 biological replicates.

(A) Primers that amplify *HO* sequence from -1471 to -1250 were used.

(B) Primers that amplify *GCD10* promoter sequence were used.
