# Supplementary material
Source: publisher figshare collection journal article supplement (https://gsajournals.figshare.com/articles/dataset/_/8171276)
Supplement: Supplementary file 4 [file 1]

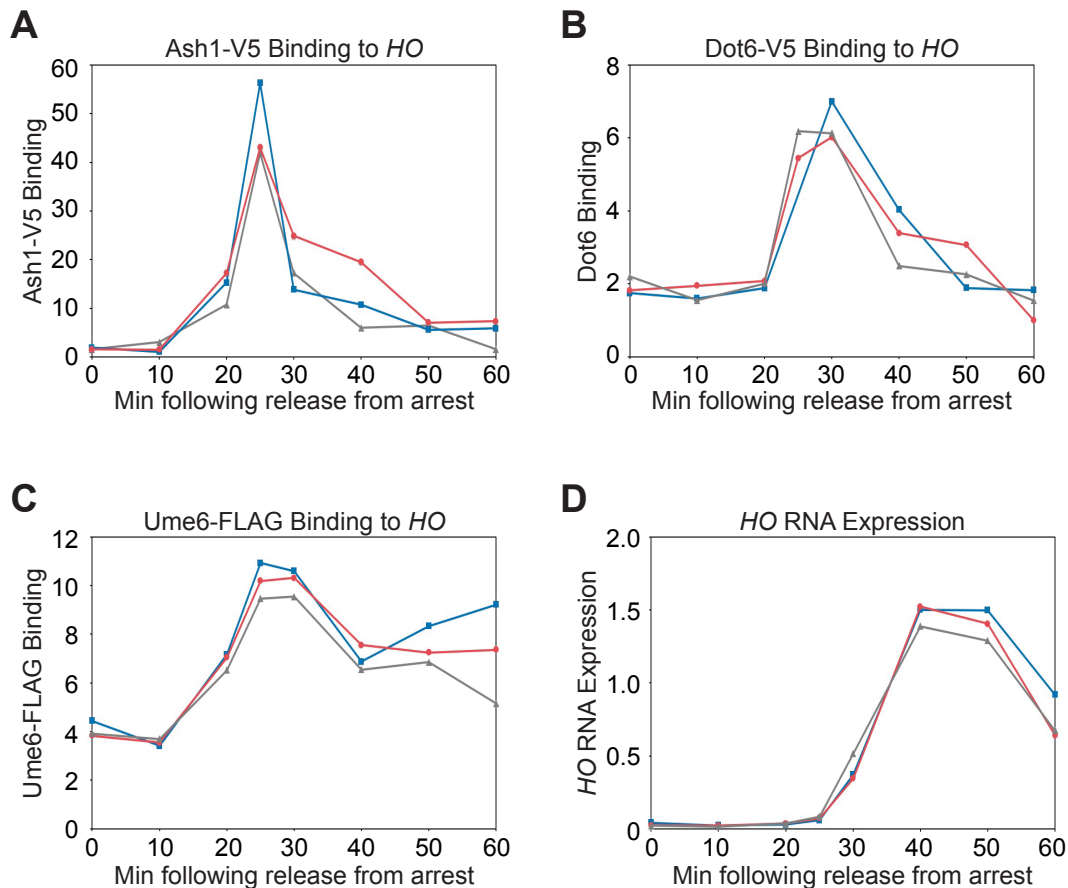

**Supplemental Figure S4. The Ash1, Dot6 and Ume6 repressors associate with the *HO* promoter before the peak of *HO* expression.**

This figure shows three biological replicate experiments for each panel in Figure 7.

(A, B, C) Binding of Ash1-V5 (A), Dot6-V5 (B), Ume6-FLAG (C) to the *HO* promoter during a cell cycle arrest and release experiment. Cells containing the *GALp::CDC20* allele were synchronized by galactose withdrawal and re-addition. The 0 min time point represents the G2/M arrest, before release with galactose addition. Cells were harvested at the indicated time points following release (x-axis), and samples were processed for ChIP analysis. Enrichment at the *HO* promoter was measured using primers that span from -1295 to -1121 and was normalized to *IGR-I* and to input.

(D) *HO* mRNA expression measured over the course of synchrony experiments (using a Dot6-V5 strain as an example) and normalized to *RPR1*.
