# Supplementary material
Source: publisher figshare collection journal article supplement (https://gsajournals.figshare.com/articles/dataset/_/8171276)
Supplement: Supplementary file 6 [file 1]

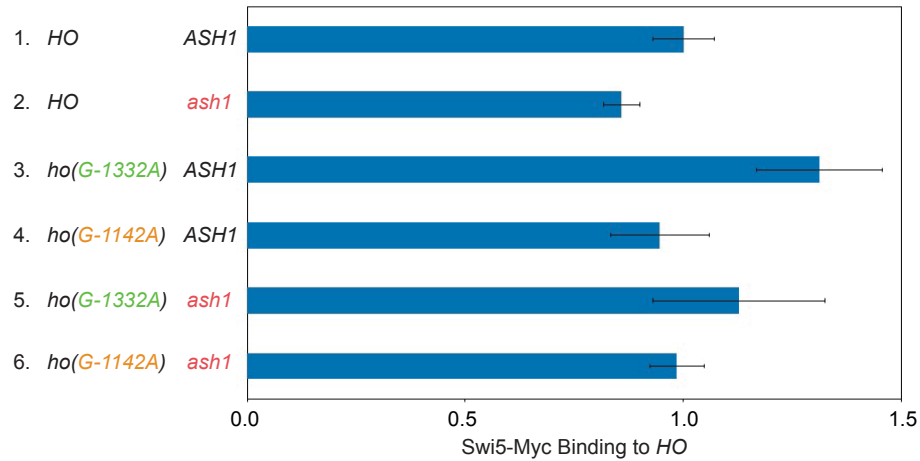

**Supplemental Figure S7. Swi5 binding to *HO* URS1 in *ash1* and *ho* promoter mutants.**

Binding of Swi5-Myc to *HO* URS1 was determined by ChIP, followed by qPCR with primers that amplify *HO* sequence from -1429 to -1158. Swi5-Myc enrichment for each sample was normalized to enrichment at the promoter of *EGT2* and to the corresponding input sample and then graphed relative to wild type. Error bars show the standard deviation of 4 biological replicates.
