# Supplementary material
Source: publisher figshare collection journal article supplement (https://gsajournals.figshare.com/articles/dataset/_/8171276)
Supplement: Supplementary file 8 [file 1]

**Supplemental Table S1. Strains used in this study.**

| Figure 1C |                                                                                                                                                      |
|-----------|------------------------------------------------------------------------------------------------------------------------------------------------------|
| DY9484    | <i>MAT<math>\alpha</math> HO-ADE2 HO-CAN1 ade2::HphMX his3 leu2 lys2 met15 trp1 ura3</i>                                                             |
| DY10171   | <i>MAT<math>\alpha</math> HO-ADE2 HO-CAN1 swi5::LEU2 RS::TRP1::ACE2::HIS3::RS ade2::HphMX his3 leu2 lys2 met15 trp1 ura3</i>                         |
| DY13589   | <i>MAT<math>\alpha</math> HO-ADE2 HO-CAN1 swi5::KanMX RS::TRP1::ACE2::HIS3::RS ash1::LEU2 ade2::HphMX his3 leu2 lys2 met15 trp1 ura3</i>             |
| EY81      | <i>MAT<math>\alpha</math> ho(G-1332A)-ADE2 HO-CAN1 swi5::LEU2 RS::TRP1::ACE2::HIS3::RS ade2::HphMX his3 leu2 lys2 met15 trp1 ura3</i>                |
| DY10239   | <i>MAT<math>\alpha</math> HO-ADE2 HO-CAN1 ace2::HIS3 ade2::HphMX his3 leu2 lys2 met15 trp1 ura3</i>                                                  |
| EY106     | <i>MAT<math>\alpha</math> HO-ADE2 HO-CAN1 swi5::LEU2 ace2::RS ade2::HphMX his3 leu2 lys2 met15 trp1 ura3</i>                                         |
| EY455     | <i>MAT<math>\alpha</math> HO-ADE2 HO-CAN1 swi5::KanMX ash1::LEU2 ace2::RS ade2::HphMX his3 leu2 lys2 met15 trp1 ura3</i>                             |
| EY320     | <i>MAT<math>\alpha</math> ho(G-1332A)-ADE2 HO-CAN1 swi5::LEU2 ace2::RS ade2::HphMX his3 leu2 lys2 met15 trp1 ura3</i>                                |
| Figure 1D |                                                                                                                                                      |
| DY9484    | <i>MAT<math>\alpha</math> HO-ADE2 HO-CAN1 ade2::HphMX his3 leu2 lys2 met15 trp1 ura3</i>                                                             |
| DY13589   | <i>MAT<math>\alpha</math> HO-ADE2 HO-CAN1 swi5::KanMX ash1::LEU2 RS::TRP1::ACE2::HIS3::RS ade2::HphMX his3 leu2 lys2 met15 trp1 ura3</i>             |
| EY424     | <i>MAT<math>\alpha</math> HO-ADE2 HO-CAN1 swi5::KanMX ash1::LEU2 hda3(T418I) RS::TRP1::ACE2::HIS3::RS ade2::HphMX his3 leu2 lys2 met15 trp1 ura3</i> |
| EY474     | <i>MAT<math>\alpha</math> HO-ADE2 HO-CAN1 swi5::KanMX ash1::LEU2 isw2(R250I) RS::TRP1::ACE2::HIS3::RS ade2::HphMX his3 leu2 lys2 met15 trp1 ura3</i> |
| EY468     | <i>MAT<math>\alpha</math> HO-ADE2 HO-CAN1 swi5::KanMX ash1::LEU2 rpd3(Y347N) RS::TRP1::ACE2::HIS3::RS ade2::HphMX his3 leu2 lys2 met15 trp1 ura3</i> |

|         |                                                                                                                                                               |
|---------|---------------------------------------------------------------------------------------------------------------------------------------------------------------|
| EY421   | <i>MAT<math>\alpha</math> HO-ADE2 HO-CAN1 swi5::KanMX ash1::LEU2 tup(H575Y)</i><br><i>RS::TRP1::ACE2::HIS3::RS ade2::HphMX his3 leu2 lys2 met15 trp1 ura3</i> |
| DY10239 | <i>MAT<math>\alpha</math> HO-ADE2 HO-CAN1 ace2::HIS3 ade2::HphMX ade2 his3 leu2 lys2 met15</i><br><i>trp1 ura3</i>                                            |
| EY455   | <i>MAT<math>\alpha</math> HO-ADE2 HO-CAN1 swi5::KanMX ash1::LEU2 ace2::RS ade2::HphMX</i><br><i>his3 leu2 lys2 met15 trp1 ura3</i>                            |
| EY445   | <i>MAT<math>\alpha</math> HO-ADE2 HO-CAN1 swi5::KanMX ash1::LEU2 hda3(T418I) ace2::RS</i><br><i>ade2::HphMX his3 leu2 lys2 met15 trp1 ura3</i>                |
| EY495   | <i>MAT<math>\alpha</math> HO-ADE2 HO-CAN1 swi5::KanMX ash1::LEU2 isw2(R250I) ace2::RS</i><br><i>ade2::HphMX his3 leu2 lys2 met15 trp1 ura3</i>                |
| EY489   | <i>MAT<math>\alpha</math> HO-ADE2 HO-CAN1 swi5::KanMX ash1::LEU2 rpd3(Y347N) ace2::RS</i><br><i>ade2::HphMX his3 leu2 lys2 met15 trp1 ura3</i>                |
| EY442   | <i>MAT<math>\alpha</math> HO-ADE2 HO-CAN1 swi5::KanMX ash1::LEU2 tup(H575Y) ace2::RS</i><br><i>ade2::HphMX his3 leu2 lys2 met15 trp1 ura3</i>                 |

Figure 2

|         |                                                                                                                       |
|---------|-----------------------------------------------------------------------------------------------------------------------|
| DY150   | <i>MATa ade2 can1 his3 leu2 trp1 ura3</i>                                                                             |
| DY408   | <i>MATa swi5::hisG-URA3-hisG ade2 can1 his3 leu2 trp1 ura3</i>                                                        |
| DY1137  | <i>MATa swi5::hisG-URA3-hisG ace2::HIS3 ade2 can1 his3 leu2 trp1 ura3</i>                                             |
| DY4846  | <i>MATa swi5::hisG-URA3-hisG ash1::LEU2 ade2 can1 his3 leu2 trp1 ura3</i>                                             |
| DY5431  | <i>MAT<math>\alpha</math> swi5::hisG-URA3-hisG ash1::LEU2 ace2::HIS3 ade2 can1 his3 leu2 lys2</i><br><i>trp1 ura3</i> |
| DY10941 | <i>MATa ho(G-1332A)::KanMX(3') ade2 can1 his3 leu2 trp1 ura3</i>                                                      |
| DY11305 | <i>MATa ho(G-1332A)::KanMX(3') swi5::LEU2 ade2 can1 his3 leu2 met15 trp1 ura3</i>                                     |
| DY11307 | <i>MATa ho(G-1332A)::KanMX(3') swi5::LEU2 ace2::HIS3 ade2 can1 his3 leu2</i><br><i>met15 trp1 ura3</i>                |
| DY12656 | <i>MATa ho(G-1332A)::KanMX(3') swi5::TRP1 ash1::LEU2 ade2 can1 his3 leu2 trp1</i><br><i>ura3</i>                      |

DY12658      *MATa ho(G-1332A)::KanMX(3') swi5::TRP1 ash1::LEU2 ace2::HIS3 ade2 can1  
his3 leu2 lys2 trp1 ura3*

Table 2

|         |                                                                                                                                                            |
|---------|------------------------------------------------------------------------------------------------------------------------------------------------------------|
| DY150   | <i>MATa ade2 can1 his3 leu2 trp1 ura3</i>                                                                                                                  |
| DY4846  | <i>MATa swi5::hisG-URA3-hisG ash1::LEU2 ade2 can1 his3 leu2 trp1 ura3</i>                                                                                  |
| DY14347 | <i>MATa swi5::TRP1 ash1::LEU2 ace2::HIS3 ade2 can1 his3 leu2 lys2 trp1 ura3</i>                                                                            |
| DY15413 | <i>MAT<math>\alpha</math> TOR1-1 fpr1::NatMX RPL13A-2xFKBP12::TRP1 CKS1::FRB::KanMX ade2<br/>can1 his3 leu2 trp1 ura3</i>                                  |
| DY15492 | <i>MAT<math>\alpha</math> TOR1-1 fpr1::NatMX RPL13A- 2xFKBP12::TRP1 CKS1::FRB::KanMX<br/>swi5::hisG-URA3-hisG ash1::LEU2 ade2 can1 his3 leu2 trp1 ura3</i> |
| DY15489 | <i>MATa TOR1-1 fpr1::NatMX RPL13A- 2xFKBP12::TRP1 CKS1::FRB::KanMX<br/>swi5::hisG-URA3-hisG ash1::LEU2 ace2::HIS3 ade2 can1 his3 leu2 trp1 ura3</i>        |
| DY14851 | <i>MATa hda1::URA3 swi5::TRP1 ash1::LEU2 ade2 can1 his3 leu2 lys2 trp1 ura3</i>                                                                            |
| DY14849 | <i>MATa hda1::URA3 swi5::TRP1 ash1::LEU2 ace2::HIS3 ade2 can1 his3 leu2 lys2<br/>trp1 ura3</i>                                                             |
| DY14496 | <i>MATa hda3::KanMX swi5::TRP1 ash1::LEU2 ade2 can1 his3 leu2 trp1 ura3</i>                                                                                |
| DY14492 | <i>MATa hda3::KanMX swi5::TRP1 ash1::LEU2 ace2::HIS3 ade2 can1 his3 leu2 trp1<br/>ura3</i>                                                                 |
| DY14237 | <i>MATa isw2::LEU2 swi5::hisG-URA3-hisG ash1::TRP1 ade2 can1 his3 leu2 trp1<br/>ura3</i>                                                                   |
| DY14241 | <i>MATa isw2::LEU2 swi5::hisG-URA3-hisG ash1::TRP1 ace2::HIS3 ade2 can1 his3<br/>leu2 trp1 ura3</i>                                                        |
| DY14865 | <i>MATa rpd3::LEU2 swi5::hisG-URA3-hisG ash1::TRP1 ade2 can1 his3 leu2 lys2<br/>trp1 ura3</i>                                                              |
| DY14862 | <i>MATa rpd3::LEU2 swi5::hisG-URA3-hisG ash1::TRP1 ace2::HIS3 ade2 can1 his3<br/>leu2 trp1 ura3</i>                                                        |

|         |                                                                                                                                                |
|---------|------------------------------------------------------------------------------------------------------------------------------------------------|
| DY16723 | <i>MATa sfp1::HphMX swi5::TRP1 ash1::LEU2 ade2 can1 his3 leu2 trp1 ura3</i>                                                                    |
| DY16708 | <i>MATa sfp1::HphMX swi5::KanMX ash1::LEU2 ace2::HIS3 ade2 can1 his3 leu2 trp1 ura3</i>                                                        |
| DY16764 | <i>MATa tup1(H575Y) swi5::KanMX ash1::LEU2 ade2 can1 his3 leu2 met15 trp1 ura3</i>                                                             |
| DY16762 | <i>MATa tup1(H575Y) swi5::KanMX ash1::LEU2 ace2::HIS3 ade2 can1 his3 leu2 trp1 ura3</i>                                                        |
| DY15373 | <i>MATa TOR1-1 fpr1::NatMX RPL13A-2xFKBP12::TRP1 UME6::FRB::KanMX ade2 can1 his3 leu2 trp1 ura3</i>                                            |
| DY15361 | <i>MATa TOR1-1 fpr1::NatMX RPL13A-2xFKBP12::TRP1 UME6::FRB::KanMX swi5::hisG-URA3-hisG ash1::LEU2 ade2 can1 his3 leu2 trp1 ura3</i>            |
| DY15359 | <i>MATa TOR1-1 fpr1::NatMX RPL13A-2xFKBP12::TRP1 UME6::FRB::KanMX swi5::hisG-URA3-hisG ash1::LEU2 ace2::HIS3 ade2 can1 his3 leu2 trp1 ura3</i> |
| DY14784 | <i>MATa dot6::NatMX tod6::KanMX swi5::hisG-URA3-hisG ash1::TRP1 ade2 can1 his3 leu2 trp1 ura3</i>                                              |
| DY14782 | <i>MATa dot6::NatMX tod6::KanMX swi5::hisG-URA3-hisG ash1::TRP1 ace2::HIS3 ade2 can1 his3 leu2 trp1 ura3</i>                                   |

---

Figure 3

---

|         |                                                                                         |
|---------|-----------------------------------------------------------------------------------------|
| DY150   | <i>MATa ade2 can1 his3 leu2 trp1 ura3</i>                                               |
| DY408   | <i>MATa swi5::hisG-URA3-hisG ade2 can1 his3 leu2 trp1 ura3</i>                          |
| DY16768 | <i>MATa tup1(H575Y) swi5::KanMX ade2 can1 his3 leu2 met15 trp1 ura3</i>                 |
| DY4846  | <i>MATa swi5::hisG-URA3-hisG ash1::LEU2 ade2 can1 his3 leu2 trp1 ura3</i>               |
| DY16764 | <i>MATa tup1(H575Y) swi5::KanMX ash1::LEU2 ade2 can1 his3 leu2 met15 trp1 ura3</i>      |
| DY16762 | <i>MATa tup1(H575Y) swi5::KanMX ash1::LEU2 ace2::HIS3 ade2 can1 his3 leu2 trp1 ura3</i> |

---

| Table 4 |                                                                                                             |
|---------|-------------------------------------------------------------------------------------------------------------|
| DY150   | <i>MATa ade2 can1 his3 leu2 trp1 ura3</i>                                                                   |
| DY408   | <i>MATa swi5::hisG-URA3-hisG ade2 can1 his3 leu2 trp1 ura3</i>                                              |
| DY4846  | <i>MATa swi5::hisG-URA3-hisG ash1::LEU2 ade2 can1 his3 leu2 trp1 ura3</i>                                   |
| DY14347 | <i>MATa swi5::TRP1 ash1::LEU2 ace2::HIS3 ade2 can1 his3 leu2 lys2 trp1 ura3</i>                             |
| EY811   | <i>MATa ho(G-1762C)::KanMX(3') swi5::URA3 ash1::LEU2 ade2 can1 his3 leu2 trp1 ura3</i>                      |
| EY807   | <i>MATa ho(G-1762C)::KanMX(3') swi5::TRP1 ash1::LEU2 ace2::HIS3 ade2 can1 his3 leu2 trp1 ura3</i>           |
| EY826   | <i>MATa ho(A-1734G)::KanMX(3') swi5::TRP1 ash1::LEU2 ade2 can1 his3 leu2 trp1 ura3</i>                      |
| EY818   | <i>MATa ho(A-1734G)::KanMX(3') swi5::TRP1 ash1::LEU2 ace2::HIS3 ade2 can1 his3 leu2 trp1 ura3</i>           |
| EY745   | <i>MATa ho(C-1442T)::HphMX(3') swi5::TRP1 ash1::LEU2 ade2 can1 his3 leu2 trp1 ura3</i>                      |
| EY744   | <i>MATa ho(C-1442T)::HphMX(3') swi5::TRP1 ash1::LEU2 ace2::HIS3 ade2 can1 his3 leu2 trp1 ura3</i>           |
| EY740   | <i>MATa ho(C-1416T)::HphMX(3') swi5::TRP1 ash1::LEU2 ade2 can1 his3 leu2 trp1 ura3</i>                      |
| EY735   | <i>MATa ho(C-1416T)::HphMX(3') swi5::hisG-URA3-hisG ash1::LEU2 ace2::HIS3 ade2 can1 his3 leu2 trp1 ura3</i> |
| EY663   | <i>MATa ho(T-1401C)::KanMX(3') swi5::hisG-URA3-hisG ash1::LEU2 ade2 can1 his3 leu2 trp1 ura3</i>            |
| EY667   | <i>MATa ho(T-1401C)::KanMX(3') swi5::hisG-URA3-hisG ash1::LEU2 ace2::HIS3 ade2 can1 his3 leu2 trp1 ura3</i> |

|         |                                                                                                             |
|---------|-------------------------------------------------------------------------------------------------------------|
| EY983   | <i>MATa ho(T-1399C)::KanMX(3') swi5::TRP1 ash1::LEU2 ade2 can1 his3 leu2 trp1 ura3</i>                      |
| EY979   | <i>MATa ho(T-1399C)::KanMX(3') swi5::TRP1 ash1::LEU2 ace2::HIS3 ade2 can1 his3 leu2 trp1 ura3</i>           |
| EY966   | <i>MATa ho(G-1358C)::KanMX(3') swi5::hisG-URA3-hisG ash1::LEU2 ade2 can1 his3 leu2 trp1 ura3</i>            |
| EY962   | <i>MATa ho(G-1358C)::KanMX(3') swi5::hisG-URA3-hisG ash1::LEU2 ace2::HIS3 ade2 can1 his3 leu2 trp1 ura3</i> |
| EY936   | <i>MATa ho(T-1338C)::KanMX(3') swi5::hisG-URA3-hisG ash1::LEU2 ade2 can1 his3 leu2 trp1 ura3</i>            |
| EY929   | <i>MATa ho(T-1338C)::KanMX(3') swi5::hisG-URA3-hisG ash1::LEU2 ace2::HIS3 ade2 can1 his3 leu2 trp1 ura3</i> |
| EY871   | <i>MATa ho(G-1335A)::HphMX(3') swi5::TRP1 ash1::LEU2 ade2 can1 his3 leu2 trp1 ura3</i>                      |
| EY868   | <i>MATa ho(G-1335A)::HphMX(3') swi5::TRP1 ash1::LEU2 ace2::HIS3 ade2 can1 his3 leu2 trp1 ura3</i>           |
| EY849   | <i>MATa ho(A-1334G)::KanMX(3') swi5::URA3 ash1::LEU2 ade2 can1 his3 leu2 trp1 ura3</i>                      |
| EY847   | <i>MATa ho(A-1334G)::KanMX(3') swi5::TRP1 ash1::LEU2 ace2::HIS3 ade2 can1 his3 leu2 trp1 ura3</i>           |
| EY951   | <i>MATa ho(T-1333C)::KanMX(3') swi5::hisG-URA3-hisG ash1::LEU2 ade2 can1 his3 leu2 trp1 ura3</i>            |
| EY947   | <i>MATa ho(T-1333C)::KanMX(3') swi5::hisG-URA3-hisG ash1::LEU2 ace2::HIS3 ade2 can1 his3 leu2 trp1 ura3</i> |
| DY12656 | <i>MATa ho(G-1332A)::KanMX(3') swi5::TRP1 ash1::LEU2 ade2 can1 his3 leu2 trp1 ura3</i>                      |

|         |                                                                                                                 |
|---------|-----------------------------------------------------------------------------------------------------------------|
| DY12658 | <i>MATa ho(G-1332A)::KanMX(3') swi5::TRP1 ash1::LEU2 ace2::HIS3 ade2 can1<br/>his3 leu2 lys2 trp1 ura3</i>      |
| EY775   | <i>MATa ho(A-1331T)::KanMX(3') swi5::hisG-URA3-hisG ash1::LEU2 ade2 can1 his3<br/>leu2 trp1 ura3</i>            |
| EY769   | <i>MATa ho(A-1331T)::KanMX(3') swi5::hisG-URA3-hisG ash1::LEU2 ace2::HIS3<br/>ade2 can1 his3 leu2 trp1 ura3</i> |
| EY672   | <i>MATa ho(T-1328A)::KanMX(3') swi5::TRP1 ash1::LEU2 ade2 can1 his3 leu2 trp1<br/>ura3</i>                      |
| EY676   | <i>MATa ho(T-1328A)::KanMX(3') swi5::TRP1 ash1::LEU2 ace2::HIS3 ade2 can1<br/>his3 leu2 lys2 trp1 ura3</i>      |
| EY922   | <i>MATa ho(G-1144A)::KanMX(3') swi5::TRP1 ash1::LEU2 ade2 can1 his3 leu2 trp1<br/>ura3</i>                      |
| EY914   | <i>MATa ho(G-1144A)::KanMX(3') swi5::TRP1 ash1::LEU2 ace2::HIS3 ade2 can1<br/>his3 leu2 trp1 ura3</i>           |
| EY696   | <i>MATa ho(C-1143T)::KanMX(3') swi5::TRP1 ash1::LEU2 ade2 can1 his3 leu2 trp1<br/>ura3</i>                      |
| EY725   | <i>MATa ho(C-1143T)::HphMX(3') swi5::TRP1 ash1::LEU2 ace2::HIS3 ade2 can1<br/>his3 leu2 trp1 ura3</i>           |
| EY906   | <i>MATa ho(G-1142A)::KanMX(3') swi5::TRP1 ash1::LEU2 ade2 can1 his3 leu2 trp1<br/>ura3</i>                      |
| EY900   | <i>MATa ho(G-1142A)::KanMX(3') swi5::TRP1 ash1::LEU2 ace2::HIS3 ade2 can1<br/>his3 leu2 trp1 ura3</i>           |
| EY890   | <i>MATa ho(G-1141A)::KanMX(3') swi5::TRP1 ash1::LEU2 ade2 can1 his3 leu2 trp1<br/>ura3</i>                      |
| EY883   | <i>MATa ho(G-1141A)::KanMX(3') swi5::TRP1 ash1::LEU2 ace2::HIS3 ade2 can1<br/>his3 leu2 trp1 ura3</i>           |

|              |                                                                                                    |
|--------------|----------------------------------------------------------------------------------------------------|
| EY840        | <i>MATa ho(A-1138G)::KanMX(3') swi5::TRP1 ash1::LEU2 ade2 can1 his3 leu2 trp1 ura3</i>             |
| EY832        | <i>MATa ho(A-1138G)::KanMX(3') swi5::TRP1 ash1::LEU2 ace2::HIS3 ade2 can1 his3 leu2 trp1 ura3</i>  |
| Figure 5A    |                                                                                                    |
| DY150        | <i>MATa ade2 can1 his3 leu2 trp1 ura3</i>                                                          |
| DY408        | <i>MATa swi5::hisG-URA3-hisG ade2 can1 his3 leu2 trp1 ura3</i>                                     |
| DY4846       | <i>MATa swi5::hisG-URA3-hisG ash1::LEU2 ade2 can1 his3 leu2 trp1 ura3</i>                          |
| DY14784      | <i>MATa dot6::NatMX tod6::KanMX swi5::hisG-URA3-hisG ash1::TRP1 ade2 can1 his3 leu2 trp1 ura3</i>  |
| Figure 5B    |                                                                                                    |
| DY17613      | <i>MATa DOT6-V5::HIS3MX ade2 can1 his3 leu2 trp1 ura3</i>                                          |
| DY17611      | <i>MATa DOT6-V5::HIS3MX ho(G-1332A)::KanMX(3') ade2 can1 his3 leu2 trp1 ura3</i>                   |
| Figure 5C    |                                                                                                    |
| DY17613      | <i>MATa DOT6-V5::HIS3MX ade2 can1 his3 leu2 trp1 ura3</i>                                          |
| DY17611      | <i>MATa DOT6-V5::HIS3MX ho(G-1332A)::KanMX(3') ade2 can1 his3 leu2 trp1 ura3</i>                   |
| DY150        | <i>MATa ade2 can1 his3 leu2 trp1 ura3</i>                                                          |
| Figure 5D, E |                                                                                                    |
| DY6669       | <i>MATa GALp::CDC20::ADE2 ade2 can1 his3 leu2 trp1 ura3</i>                                        |
| DY17662      | <i>MATa GALp::CDC20::ADE2 DOT6-V5::HIS3MX ade2 can1 his3 leu2 trp1 ura3</i>                        |
| DY17660      | <i>MATa GALp::CDC20::ADE2 DOT6-V5::HIS3MX ho(G-1332A)::KanMX(3') ade2 can1 his3 leu2 trp1 ura3</i> |
| Figure 6A    |                                                                                                    |
| DY13782      | <i>MATa UME6-Flag(3)::URA3::Flag(3) ade2 can1 his3 leu2 trp1 ura3</i>                              |
| DY16059      | <i>MATa UME6-Flag(3)::URA3::Flag(3) ho(G-1142A)::KanMX(3') ade2 can1 his3 leu2 trp1 ura3</i>       |



|           |                                                                                                                                                 |
|-----------|-------------------------------------------------------------------------------------------------------------------------------------------------|
| Figure 6B |                                                                                                                                                 |
| DY13782   | <i>MATa UME6-Flag(3)::URA3::Flag(3) ade2 can1 his3 leu2 trp1 ura3</i>                                                                           |
| DY16059   | <i>MATa UME6-Flag(3)::URA3::Flag(3) ho(G-1142A)::KanMX(3') ade2 can1 his3 leu2 trp1 ura3</i>                                                    |
| DY150     | <i>MATa ade2 can1 his3 leu2 trp1 ura3</i>                                                                                                       |
| Figure 6C |                                                                                                                                                 |
| DY15373   | <i>MATa TOR1-1 fpr1::NatMX RPL13A-2xFKBP12::TRP1 UME6::FRB::KanMX ade2 can1 his3 leu2 trp1 ura3</i>                                             |
| DY15365   | <i>MATa TOR1-1 fpr1::NatMX RPL13A-2xFKBP12::TRP1 UME6::FRB::KanMX swi5::hisG-URA3-hisG ade2 can1 his3 leu2 trp1 ura3</i>                        |
| DY15363   | <i>MATa TOR1-1 fpr1::NatMX RPL13A-2xFKBP12:::TRP1 UME6::FRB::KanMX swi5::hisG-URA3-hisG ace2::HIS3 ade2 can1 his3 leu2 trp1 ura3</i>            |
| DY15361   | <i>MATa TOR1-1 fpr1::NatMX RPL13A-2xFKBP12:::TRP1 UME6::FRB::KanMX swi5::hisG-URA3-hisG ash1::LEU2 ade2 can1 his3 leu2 trp1 ura3</i>            |
| DY15359   | <i>MATa TOR1-1 fpr1::NatMX RPL13A-2xFKBP12:::TRP1 UME6::FRB::KanMX swi5::hisG-URA3-hisG ash1::LEU2 ace2::HIS3 ade2 can1 his3 leu2 trp1 ura3</i> |
| Figure 7  |                                                                                                                                                 |
| DY18522   | <i>MATa GALp::CDC20::ADE2 ASH1-V5::HIS3MX ade2 can1 his3 leu2 trp1 ura3</i>                                                                     |
| DY17658   | <i>MATa GALp::CDC20::ADE2 UME6-Flag(3)::URA3::Flag(3) ade2 can1 his3 leu2 trp1 ura3</i>                                                         |
| DY17662   | <i>MATa GALp::CDC20::ADE2 DOT6-V5::HIS3MX ade2 can1 his3 leu2 trp1 ura3</i>                                                                     |
| Figure 8A |                                                                                                                                                 |
| DY18407   | <i>MATa ASH1-V5::HIS3MX ade2 can1 his3 leu2 trp1 ura3</i>                                                                                       |
| DY19541   | <i>MATa ASH1-V5::HIS3MX ho(G-1332A)::KanMX(3') ade2 can1 his3 leu2 trp1 ura3</i>                                                                |
| DY18708   | <i>MATa ASH1-V5::HIS3MX ho(G-1142A)::KanMX(3') ade2 can1 his3 leu2 trp1 ura3</i>                                                                |

|         |                                                                                           |
|---------|-------------------------------------------------------------------------------------------|
| DY19543 | <i>MATa ASH1-V5::HIS3MX ho(G-1332A, G-1142A)::KanMX(3') ade2 can1 his3 leu2 trp1 ura3</i> |
|---------|-------------------------------------------------------------------------------------------|

---

Figure 8B

|         |                                                                                             |
|---------|---------------------------------------------------------------------------------------------|
| DY17613 | <i>MATa DOT6-V5::HIS3MX ade2 can1 his3 leu2 trp1 ura3</i>                                   |
| DY19537 | <i>MATa DOT6-V5::HIS3MX ash1::LEU2 ade2 can1 his3 leu2 trp1 ura3</i>                        |
| DY19535 | <i>MATa DOT6-V5::HIS3MX ho(G-1142A)::HphMX(3') ade2 can1 his3 leu2 trp1 ura3</i>            |
| DY19533 | <i>MATa DOT6-V5::HIS3MX ho(G-1142A)::HphMX(3') ash1::LEU2 ade2 can1 his3 leu2 trp1 ura3</i> |

---

Figure 8C

|         |                                                                                                         |
|---------|---------------------------------------------------------------------------------------------------------|
| DY13782 | <i>MATa UME6-Flag(3)::URA3::Flag(3) ade2 can1 his3 leu2 trp1 ura3</i>                                   |
| DY14354 | <i>MATa UME6-Flag(3)::URA3::Flag(3) ash1::LEU2 ade2 can1 his3 leu2 trp1 ura3</i>                        |
| DY13781 | <i>MATa UME6-Flag(3)::URA3::Flag(3) ho(G-1332A)::KanMX(3') ade2 can1 his3 leu2 trp1 ura3</i>            |
| DY19539 | <i>MATa UME6-Flag(3)::URA3::Flag(3) ho(G-1332A)::KanMX(3') ash1::LEU2 ade2 can1 his3 leu2 trp1 ura3</i> |

---

Figure 9

|         |                                                                                      |
|---------|--------------------------------------------------------------------------------------|
| DY150   | <i>MATa ade2 can1 his3 leu2 trp1 ura3</i>                                            |
| DY10941 | <i>MATa ho(G-1332A)::KanMX(3') ade2 can1 his3 leu2 trp1 ura3</i>                     |
| DY16057 | <i>MATa ho(G-1142A)::KanMX(3') ade2 can1 his3 leu2 trp1 ura3</i>                     |
| DY16968 | <i>MATa ho(G-1332A, G-1142A)::KanMX(3') ade2 can1 his3 leu2 trp1 ura3</i>            |
| DY4394  | <i>MATa ash1::LEU2 ade2 can1 his3 leu2 trp1 ura3</i>                                 |
| DY12581 | <i>MATa ho(G-1332A)::KanMX(3') ash1::LEU2 ade2 can1 his3 leu2 trp1 ura3</i>          |
| DY16610 | <i>MATa ho(G-1142A)::HphMX(3') ash1::LEU2 ade2 can1 his3 leu2 trp1 ura3</i>          |
| DY16974 | <i>MATa ho(G-1332A, G-1142A)::KanMX(3') ash1::LEU2 ade2 can1 his3 leu2 trp1 ura3</i> |
| DY408   | <i>MATa swi5::hisG-URA3-hisG ade2 can1 his3 leu2 trp1 ura3</i>                       |

|         |                                                                                                 |
|---------|-------------------------------------------------------------------------------------------------|
| DY15892 | <i>MATa ho(G-1332A)::KanMX(3') swi5::hisG-URA3-hisG ade2 can1 his3 leu2 trp1 ura3</i>           |
| DY15940 | <i>MATa ho(G-1142A)::KanMX(3') swi5::hisG-URA3-hisG ade2 can1 his3 leu2 trp1 ura3</i>           |
| DY16965 | <i>MATa ho(G-1332A, G-1142A)::KanMX(3') swi5::TRP1 ade2 can1 his3 leu2 trp1 ura3</i>            |
| DY4846  | <i>MATa swi5::hisG-URA3-hisG ash1::LEU2 ade2 can1 his3 leu2 trp1 ura3</i>                       |
| DY12656 | <i>MATa ho(G-1332A)::KanMX(3') swi5::TRP1 ash1::LEU2 ade2 can1 his3 leu2 trp1 ura3</i>          |
| DY15937 | <i>MATa ho(G-1142A)::KanMX(3') swi5::TRP1 ash1::LEU2 ade2 can1 his3 leu2 trp1 ura3</i>          |
| DY16963 | <i>MATa ho(G-1332A, G-1142A)::KanMX(3') swi5::TRP1 ash1::LEU2 ade2 can1 his3 leu2 trp1 ura3</i> |

---

Figure 10

---

|         |                                                                                                      |
|---------|------------------------------------------------------------------------------------------------------|
| DY17742 | <i>MATa RPD3-V5::HIS3MX ho(9xSBFmut) ade2 can1 his3 leu2 trp1 ura3</i>                               |
| DY17693 | <i>MATa RPD3-V5::HIS3MX ho(9xSBFmut) ash1:LEU2 ade2 can1 his3 leu2 trp1 ura3</i>                     |
| DY17744 | <i>MATa RPD3-V5::HIS3MX ho(G-1332A, 9xSBFmut)::KanMX(3') ade2 can1 his3 leu2 trp1 ura3</i>           |
| DY18666 | <i>MATa RPD3-V5::HIS3MX ho(G-1142A, 9xSBFmut)::KanMX(3') ade2 can1 his3 leu2 trp1 ura3</i>           |
| DY17748 | <i>MATa RPD3-V5::HIS3MX ho(G-1332A, 9xSBFmut)::KanMX(3') ash1:LEU2 ade2 can1 his3 leu2 trp1 ura3</i> |
| DY17752 | <i>MATa RPD3-V5::HIS3MX ho(G-1142A, 9xSBFmut) ash1:LEU2 ade2 can1 his3 leu2 trp1 ura3</i>            |
| DY17682 | <i>MATa RPD3-V5::HIS3MX ho(G-1332A, G-1142A, 9xSBFmut)::KanMX(3') ade2 can1 his3 leu2 trp1 ura3</i>  |

|               |                                                                                                                          |
|---------------|--------------------------------------------------------------------------------------------------------------------------|
| DY17750       | <i>MATa RPD3-V5::HIS3MX ho(G-1332A, G-1142A, 9xSBFmut)::KanMX(3')</i><br><i>ash1::LEU2 ade2 can1 his3 leu2 trp1 ura3</i> |
| Figure 11     |                                                                                                                          |
| DY19207       | <i>MATa SWI2-V5::HphMX ade2 can1 his3 leu2 trp1 ura3</i>                                                                 |
| DY19250       | <i>MATa SWI2-V5::HphMX swi5::TRP1 ade2 can1 his3 leu2 trp1 ura3</i>                                                      |
| DY19330       | <i>MATa SWI2-V5::HphMX swi5::TRP1 ash1::LEU2 ade2 can1 his3 leu2 trp1 ura3</i>                                           |
| DY19247       | <i>MATa SWI2-V5::HphMX ho(G-1332A)::KanMX(3') swi5::TRP1 ade2 can1 his3</i><br><i>leu2 trp1 ura3</i>                     |
| DY19251       | <i>MATa SWI2-V5::HphMX ho(G-1142A)::KanMX(3') swi5::TRP1 ade2 can1 his3 leu2</i><br><i>trp1 ura3</i>                     |
| DY19491       | <i>MATa SWI2-V5::HphMX ho(G-1332A)::KanMX(3') swi5::TRP1 ash1::LEU2 ade2</i><br><i>can1 his3 leu2 trp1 ura3</i>          |
| DY19493       | <i>MATa SWI2-V5::HphMX ho(G-1142A)::KanMX(3') swi5::TRP1 ash1::LEU2 ade2</i><br><i>can1 his3 leu2 trp1 ura3</i>          |
| DY19326       | <i>MATa SWI2-V5::HphMX ho(G-1332A, G-1142A)::KanMX(3') swi5::TRP1 ade2</i><br><i>can1 his3 leu2 trp1 ura3</i>            |
| DY19323       | <i>MATa SWI2-V5::HphMX ho(G-1332A, G-1142A)::KanMX(3') swi5::TRP1</i><br><i>ash1::LEU2 ade2 can1 his3 leu2 trp1 ura3</i> |
| Figure S1A, B |                                                                                                                          |
| DY17613       | <i>MATa DOT6-V5::HIS3MX ade2 can1 his3 leu2 trp1 ura3</i>                                                                |
| DY17611       | <i>MATa DOT6-V5::HIS3MX ho(G-1332A)::KanMX(3') ade2 can1 his3 leu2 trp1 ura3</i>                                         |
| DY150         | <i>MATa ade2 can1 his3 leu2 trp1 ura3</i>                                                                                |
| Figure S2A, B |                                                                                                                          |
| DY13782       | <i>MATa UME6-Flag(3)::URA3::Flag(3) ade2 can1 his3 leu2 trp1 ura3</i>                                                    |
| DY16059       | <i>MATa UME6-Flag(3)::URA3::Flag(3) ho(G-1142A)::KanMX(3') ade2 can1 his3</i><br><i>leu2 trp1 ura3</i>                   |
| DY150         | <i>MATa ade2 can1 his3 leu2 trp1 ura3</i>                                                                                |

---

**Figure S3**

---

|         |                                                                                                                                                |
|---------|------------------------------------------------------------------------------------------------------------------------------------------------|
| DY15373 | <i>MATa TOR1-1 fpr1::NatMX RPL13A-2xFKBP12::TRP1 UME6::FRB::KanMX ade2 can1 his3 leu2 trp1 ura3</i>                                            |
| DY15365 | <i>MATa TOR1-1 fpr1::NatMX RPL13A-2xFKBP12::TRP1 UME6::FRB::KanMX swi5::hisG-URA3-hisG ade2 can1 his3 leu2 trp1 ura3</i>                       |
| DY15363 | <i>MATa TOR1-1 fpr1::NatMX RPL13A-2xFKBP12::TRP1 UME6::FRB::KanMX swi5::hisG-URA3-hisG ace2::HIS3 ade2 can1 his3 leu2 trp1 ura3</i>            |
| DY15361 | <i>MATa TOR1-1 fpr1::NatMX RPL13A-2xFKBP12::TRP1 UME6::FRB::KanMX swi5::hisG-URA3-hisG ash1::LEU2 ade2 can1 his3 leu2 trp1 ura3</i>            |
| DY15359 | <i>MATa TOR1-1 fpr1::NatMX RPL13A-2xFKBP12::TRP1 UME6::FRB::KanMX swi5::hisG-URA3-hisG ash1::LEU2 ace2::HIS3 ade2 can1 his3 leu2 trp1 ura3</i> |

---

**Figure S4**

---

|         |                                                                                         |
|---------|-----------------------------------------------------------------------------------------|
| DY18522 | <i>MATa GALp::CDC20::ADE2 ASH1-V5::HIS3MX ade2 can1 his3 leu2 trp1 ura3</i>             |
| DY17658 | <i>MATa GALp::CDC20::ADE2 UME6-Flag(3)::URA3::Flag(3) ade2 can1 his3 leu2 trp1 ura3</i> |
| DY17662 | <i>MATa GALp::CDC20::ADE2 DOT6-V5::HIS3MX ade2 can1 his3 leu2 trp1 ura3</i>             |

---

**Figure S5A, B**

---

|         |                                                                                                      |
|---------|------------------------------------------------------------------------------------------------------|
| DY17742 | <i>MATa RPD3-V5::HIS3MX ho(9xSBFmut) ade2 can1 his3 leu2 trp1 ura3</i>                               |
| DY17693 | <i>MATa RPD3-V5::HIS3MX ho(9xSBFmut) ash1:LEU2 ade2 can1 his3 leu2 trp1 ura3</i>                     |
| DY17744 | <i>MATa RPD3-V5::HIS3MX ho(G-1332A, 9xSBFmut)::KanMX(3') ade2 can1 his3 leu2 trp1 ura3</i>           |
| DY18666 | <i>MATa RPD3-V5::HIS3MX ho(G-1142A, 9xSBFmut)::KanMX(3') ade2 can1 his3 leu2 trp1 ura3</i>           |
| DY17748 | <i>MATa RPD3-V5::HIS3MX ho(G-1332A, 9xSBFmut)::KanMX(3') ash1:LEU2 ade2 can1 his3 leu2 trp1 ura3</i> |

|         |                                                                                                                |
|---------|----------------------------------------------------------------------------------------------------------------|
| DY17752 | <i>MATa RPD3-V5::HIS3MX ho(G-1142A, 9xSBFmut) ash1::LEU2 ade2 can1 his3 leu2 trp1 ura3</i>                     |
| DY17682 | <i>MATa RPD3-V5::HIS3MX ho(G-1332A, G-1142A, 9xSBFmut)::KanMX(3') ade2 can1 his3 leu2 trp1 ura3</i>            |
| DY17750 | <i>MATa RPD3-V5::HIS3MX ho(G-1332A, G-1142A, 9xSBFmut)::KanMX(3') ash1::LEU2 ade2 can1 his3 leu2 trp1 ura3</i> |
| DY17746 | <i>MATa RPD3-V5::HIS3MX ho(9xSBFmut) ash1::LEU2 sin3:hisG ade2 can1 his3 leu2 trp1 ura3</i>                    |
| DY17753 | <i>MATa ho(9xSBFmut) ade2 can1 his3 leu2 trp1 ura3</i>                                                         |

---

Figure S6A, B

|         |                                                                                                                |
|---------|----------------------------------------------------------------------------------------------------------------|
| DY19207 | <i>MATa SWI2-V5::HphMX ade2 can1 his3 leu2 trp1 ura3</i>                                                       |
| DY19250 | <i>MATa SWI2-V5::HphMX swi5::TRP1 ade2 can1 his3 leu2 trp1 ura3</i>                                            |
| DY19330 | <i>MATa SWI2-V5::HphMX swi5::TRP1 ash1::LEU2 ade2 can1 his3 leu2 trp1 ura3</i>                                 |
| DY19247 | <i>MATa SWI2-V5::HphMX ho(G-1332A)::KanMX(3') swi5::TRP1 ade2 can1 his3 leu2 trp1 ura3</i>                     |
| DY19251 | <i>MATa SWI2-V5::HphMX ho(G-1142A)::KanMX(3') swi5::TRP1 ade2 can1 his3 leu2 trp1 ura3</i>                     |
| DY19491 | <i>MATa SWI2-V5::HphMX ho(G-1332A)::KanMX(3') swi5::TRP1 ash1::LEU2 ade2 can1 his3 leu2 trp1 ura3</i>          |
| DY19493 | <i>MATa SWI2-V5::HphMX ho(G-1142A)::KanMX(3') swi5::TRP1 ash1::LEU2 ade2 can1 his3 leu2 trp1 ura3</i>          |
| DY19326 | <i>MATa SWI2-V5::HphMX ho(G-1332A, G-1142A)::KanMX(3') swi5::TRP1 ade2 can1 his3 leu2 trp1 ura3</i>            |
| DY19323 | <i>MATa SWI2-V5::HphMX ho(G-1332A, G-1142A)::KanMX(3') swi5::TRP1 ash1::LEU2 ade2 can1 his3 leu2 trp1 ura3</i> |

---

Figure S7

|        |                                                              |
|--------|--------------------------------------------------------------|
| DY5832 | <i>MATa SWI5-Myc(8)::KanMX ade2 can1 his3 leu2 trp1 ura3</i> |
|--------|--------------------------------------------------------------|

---

|                                   |                                                                                                                              |
|-----------------------------------|------------------------------------------------------------------------------------------------------------------------------|
| DY8749                            | <i>MATa SWI5-Myc(8)::KanMX ash1::TRP1 ade2 can1 his3 leu2 trp1</i>                                                           |
| DY17188                           | <i>MATa SWI5-Myc(8)::KanMX ho(G-1332A)::HphMX(3') ade2 can1 his3 leu2 trp1</i>                                               |
| DY18096                           | <i>MATa SWI5-Myc(8)::KanMX ho(G-1142A)::HphMX(3') ade2 can1 his3 leu2 trp1</i>                                               |
| DY17186                           | <i>MATa SWI5-Myc(8)::KanMX ho(G-1332A)::HphMX(3') ash1::TRP1 ade2 can1 his3 leu2 trp1</i>                                    |
| DY18098                           | <i>MATa SWI5-Myc(8)::KanMX ho(G-1142A)::HphMX(3') ash1::TRP1 ade2 can1 his3 leu2 trp1</i>                                    |
| <hr/> Materials and Methods <hr/> |                                                                                                                              |
| DY10171                           | <i>MAT<math>\alpha</math> HO-ADE2 HO-CAN1 swi5::LEU2 RS::TRP1::ACE2::HIS3::RS ade2::HphMX his3 leu2 lys2 met15 trp1 ura3</i> |
| DY10085                           | <i>MAT<math>\alpha</math> HO-ADE2 HO-CAN1 swi5::LEU2 ade2::HphMX his3 leu2 lys2 met15 trp1 ura3</i>                          |
| DY10941                           | <i>MATa ho(G-1332A)::KanMX(3') ade2 can1 his3 leu2 trp1 ura3</i>                                                             |
| DY7874                            | <i>MATa ho[URA3(-1496 to -1222 deleted)]::KanMX(3') ade2 can1 his3 leu2 trp1 ura3</i>                                        |
| DY14815                           | <i>MATa ho[URA3(K. lactis)::KanMX(inserted at -1750)] swi5::TRP1 ash1::LEU2 ade2 can1 his3 leu2 trp1 ura3</i>                |
| DY14198                           | <i>MATa ho[URA3(-1496 to -1222 deleted)]::KanMX(3') swi5::TRP1 ash1::LEU2 ade2 can1 his3 leu2 trp1 ura3</i>                  |
| DY14840                           | <i>MATa ho[URA3(K. lactis)::KanMX(inserted at -1200)] swi5::TRP1 ash1::LEU2 ade2 can1 his3 leu2 trp1 ura3</i>                |
| DY15937                           | <i>MATa ho(G-1142A)::KanMX(3') swi5:TRP1 ash1:LEU2 ade2 can1 his3 leu2 trp1 ura3</i>                                         |
| DY14839                           | <i>MATa ho[URA3(K. lactis)::KanMX(inserted at -1200)] swi5::TRP1 ash1::LEU2 ade2 can1 his3 leu2 trp1 ura3</i>                |
| Y40343                            | <i>MAT<math>\alpha</math> TOR1-1 fpr1::NatMX RPL13A-2xFKBP12::TRP1 ade2 can1 his3 leu2 trp1 ura3</i>                         |

|         |                                                                                                                                                                                         |
|---------|-----------------------------------------------------------------------------------------------------------------------------------------------------------------------------------------|
| DY13589 | <i>MAT<math>\alpha</math> HO-ADE2 HO-CAN1 swi5::KanMX ash1::LEU2 RS::TRP1::ACE2::HIS3::RS<br/>ade2::HphMX his3 leu2 lys2 met15 trp1 ura3</i>                                            |
| DY10061 | <i>MAT<math>\alpha</math> HO-ADE2::KanMX(3') HO-CAN1 swi5::LEU2 ade2 his3 leu2 met15 trp1<br/>ura3</i>                                                                                  |
| DY13857 | <i>MAT<math>\alpha</math> HO-ADE2::NatMX(3') HO-CAN1 ash1::LEU2 swi5::KanMX ade2 his3 leu2<br/>met15 trp1 ura3</i>                                                                      |
| DY10174 | <i>MAT<math>\alpha</math> HO-ADE2 HO-CAN1 swi5::LEU2 ace2::HIS3 ade2 his3 leu2 met15 trp1<br/>ura3</i>                                                                                  |
| DY13855 | <i>MAT<math>\alpha</math> HO-ADE2::NatMX(3') HO-CAN1 swi5::KanMX ash1::LEU2 ace2::HIS3 ade2<br/>his3 leu2 met15 trp1 ura3</i>                                                           |
| DY9341  | <i>MAT<math>\Delta</math>::LEU2 HO-ADE2 HO-CAN1 swi5::KanMX ade2 his3 leu2 met15 ura3</i>                                                                                               |
| DY13891 | <i>MAT<math>\Delta</math>::NATMX HO-ADE2 HO-CAN1 swi5::KanMX ash1::LEU2 ade2 his3 leu2<br/>trp1 ura3</i>                                                                                |
| DY13862 | <i>MAT<math>\alpha</math> ho(-1496 to -1130 deleted)-ADE2::KanMX(3') swi5::LEU2<br/>RS::TRP1::ACE2::HIS3::RS ade2::HphMX can1 his3 leu2 lys2 trp1 ura3</i>                              |
| DY13863 | <i>MAT<math>\alpha</math> ho[sup4-o(-1496 to -1222 deleted)]-ADE2::KanMX swi5::LEU2<br/>RS::TRP1::ACE2::HIS3::RS ade2::HphMX can1 his3 leu2 lys2 trp1 ura3</i>                          |
| DY13925 | <i>MAT<math>\alpha</math> ho[sup4-o(-1496 to -1222 deleted)]-ADE2::KanMX swi5::hisG-URA3-hisG<br/>ash1::LEU2 RS::TRP1::ACE2::HIS3::RS ade2::HphMX can1 his3 leu2 lys2 trp1<br/>ura3</i> |
| DY13832 | <i>MAT<math>\alpha</math> ho[URA3(-1496 to -1222 deleted)]:KanMX(3') swi5::LEU2<br/>RS::TRP1::ACE2::HIS3::RS ade2::HphMX can1 his3 leu2 lys2 trp1 ura3</i>                              |

---
