# Supplementary material
Source: publisher figshare collection journal article supplement (https://gsajournals.figshare.com/articles/dataset/_/8171276)
Supplement: Supplementary file 9 [file 1]

---

**Supplemental Table S2. Plasmids used in this study.**

---

|              |                                                                                                 |
|--------------|-------------------------------------------------------------------------------------------------|
| M5011        | <i>RS::TRP1::ACE2</i> in YEp24 (YEp- <i>URA3</i> )                                              |
| M5048        | <i>ACE2::HIS3::RS</i> in YEp24 (YEp- <i>URA3</i> )                                              |
| M4915        | <i>HO</i> in YCplac22 (YCp- <i>TRP1</i> )                                                       |
| M5181        | <i>ho(G-1332A)-ADE2</i> in YCplac22 (YCp- <i>TRP1</i> )                                         |
| M4531        | <i>KanMX</i> inserted 3' to <i>HO</i> gene in pGEM7                                             |
| pZC03        | pFA6a-TEV-6xGly-V5-HIS3MX tagging cassette in pFA6                                              |
| ZM467        | <i>Flag(3)::URA3::Flag(3)</i> tagging cassette in pBluescript SK<br>(Moqtaderi and Struhl 2008) |
| P30578       | pFA6a-FRB-KanMX tagging cassette in pFA6<br>(Haruki <i>et al.</i> 2008)                         |
| M5053        | pGAL::Z. rouxii recombinase in pRS317 (YCp- <i>LYS2</i> )                                       |
| M2291        | <i>ACE2</i> in YCplac33 (YCp- <i>URA3</i> )                                                     |
| pFA6-KanMX4  | KanMX4 disruptor cassette in pFA6<br>(Wach <i>et al.</i> 1994)                                  |
| pAG25-NatMX4 | NatMX4 disruptor cassette in pFA6<br>(Goldstein and Mccusker 1999)                              |
| M2291        | <i>ACE2</i> in YCplac33 (YCp- <i>URA3</i> )                                                     |
| M5404        | <i>ASH1</i> in pRS306 (YIp- <i>URA3</i> )                                                       |
| M2026        | <i>ho[URA3(-1496 to -1222 deleted)]</i> in pIC19R                                               |
| M346         | <i>ho(-1496 to -1130 deleted)</i> in pBR322                                                     |
| M3208        | <i>ho[sup4-o(-1496 to -1222 deleted)]</i> in pGEM7zf                                            |

---

**References**

Goldstein, A. L., and J. H. McCusker, 1999 Three new dominant drug resistance cassettes for gene disruption in *Saccharomyces cerevisiae*. *Yeast* 15: 1541-1553.

Haruki, H., J. Nishikawa and U. K. Laemmli, 2008 The anchor-away technique: rapid, conditional establishment of yeast mutant phenotypes. *Mol Cell* 31: 925-932.

- Moqtaderi, Z., and K. Struhl, 2008 Expanding the repertoire of plasmids for PCR-mediated epitope tagging in yeast. *Yeast* 25: 287-292.
- Wach, A., A. Brachat, R. Pohlmann and P. Philippsen, 1994 New heterologous modules for classical or PCR-based gene disruptions in *Saccharomyces cerevisiae*. *Yeast* 10: 1793-1808.
